# Bidirectional effects of anxiety and anorexia nervosa: A Mendelian randomization study

E Caitlin Lloyd<sup>1</sup>, Hannah Sallis<sup>2,3,4</sup>, Bas Verplanken<sup>5</sup>, Anne M Haase<sup>1</sup>, Marcus R Munafò<sup>2,3,6</sup>

<sup>1</sup> Centre for Exercise, Nutrition and Health Sciences, School of Policy Studies, University of Bristol, Bristol, BS8 1TZ, United Kingdom

<sup>2</sup> MRC Integrative Epidemiology Unit at the University of Bristol, Bristol, BS8 2BN, United Kingdom

<sup>3</sup> UK Centre for Tobacco and Alcohol Studies, School of Psychological Science, University of Bristol, Bristol, BS8 1TU, United Kingdom

<sup>4</sup> Population Health Sciences, Bristol Medical School, University of Bristol, Bristol, BS8 2PS, United Kingdom

<sup>5</sup> Department of Psychology, University of Bath, Bath, BA2 7AY, UK

<sup>6</sup> National Institute for Health Research Bristol Biomedical Research Centre at the University Hospitals Bristol NHS Foundation Trust and the University of Bristol, Bristol, United Kingdom

## Abstract

**Objectives** To assess bidirectional effects of anxiety and anorexia nervosa (AN) phenotypes.

**Design** Two-sample Mendelian randomization.

**Setting** Genome-wide association study (GWAS) summary statistics from the Psychiatric Genomics Consortium (PGC), analysis of the UK Biobank sample, and Anxiety Neuro Genetics Study (ANGST) consortium.

**Participants** European descent participants from the PGC (n = 14,477), UK Biobank (n = 348,219), and ANGST consortium (n = 17,310, and n = 18,186).

**Main outcome measures** AN diagnosis, worry, anxiety disorder pathology (case-control and quantitative phenotypes).

**Results** We found evidence of a moderate genetic correlation between worry and AN ( $R_g = 0.36$ ,  $SE = 0.05$ ,  $p < 0.001$ ), and the Mendelian randomization analysis supported a causal influence of worry on AN ( $OR = 2.14$ , 95% CI: 1.18 to 3.90,  $p = 0.01$ ). There was no clear evidence for a causal effect of AN on worry in this study ( $B = -0.01$ , 95% CI: -0.03 to 0.02,  $p = 0.55$ ). There was no robust evidence for a causal influence of anxiety disorders on AN (for case-control anxiety disorder phenotype:  $OR = 1.02$ , 95% CI: 0.69, 1.50,  $p = 0.922$ ; for quantitative anxiety disorder phenotype:  $OR = 4.26$ , 95% CI: 0.49, 36.69,  $p = 0.187$ ). There was no robust evidence for a causal effect of AN on anxiety disorders (for case control anxiety disorder phenotype:  $OR = 1.00$ , 95% CI: 0.72, 1.38,  $p = 0.981$ ; for quantitative anxiety disorder phenotype:  $B = 0.01$ , 95% CI: -0.06, 0.06,  $p = 0.761$ ). AN and anxiety disorder phenotypes were not genetically correlated (for case-control anxiety disorder phenotype:  $R_g = 0.10$ ,  $se = 0.17$ ,  $p = .56$ ; for quantitative anxiety disorder phenotype:  $R_g = 0.12$ ,  $SE = 0.17$ ,  $p = 0.47$ ).

**Conclusions** Findings support a role for worry in AN development, highlighting a potential target of future AN prevention efforts. Mechanisms underlying the association should be a

focus of future investigation. The relatively small sample sizes of anxiety disorder and AN GWASs may have limited power to detect causal effects; these associations should be studied further.

# Introduction

Anorexia nervosa (AN) is a serious eating disorder that is characterised by persistent restriction of caloric intake and fear of weight-gain in the context of a low body weight (1). AN has a lifetime prevalence rate of approximately 1 to 4% (2, 3), a range of lasting physical health complications (4), and the highest mortality rate of any psychiatric disorder (5). No single treatment or set of treatments has been found to be consistently successful, with AN recovery rates following treatment below 50% (6).

The scope for targeting putative mechanisms of AN is currently limited. Despite substantial development in the study of AN, with investigations focusing on a range of possible mechanisms (e.g. genetic, neural, psychological and personality factors), the aetiology of the disorder remains largely unknown (7). A number of models of illness have proposed a causal role of anxiety that does not surround eating and weight-gain (i.e., anxiety that is not explained by a diagnosis of AN) in the development of AN (8-11). Empirical evidence has provided some support for such models. Trait anxiety, a proneness to experiencing anxiety generally, is reported to be higher in individuals with AN as compared to healthy controls (12-14), and anxiety disorder prevalence is elevated in AN populations, as compared to the general population (15, 16). Importantly, retrospective studies report both anxious temperament and anxiety disorder pathology to precede the onset of AN (17-20), although findings from prospective studies are mixed (21, 22).

Although current evidence generally is consistent with a causal effect of anxiety on AN, the reported associations are at risk of confounding by unmeasured, or inadequately measured, factors. Demographic characteristics or other psychiatric comorbidities may increase risk for both anxiety and AN, serving to induce a correlation between the two, in the absence of a

causal relationship. Reverse causation is also a possibility, with observed associations being driven by AN influencing anxiety, rather than the other way around. The association between malnutrition and anxiety in AN is currently unclear (23). However, nutrition affects various hormonal and neurotransmitter systems implicated in anxiety, changes to which have been observed in AN (24-27), and dietary restriction results in psychological and emotional changes in populations without AN (28, 29). A recent prospective study also found AN to increase the likelihood of a later anxiety disorder diagnosis (30). The biases that studies using traditional epidemiologic methods are subject to (e.g. confounding and reverse causation) mean that it is difficult to draw strong conclusions concerning the causal role of anxiety in AN using the existing evidence. However, being able to make confident inferences would better inform models of illness and the subsequent development of novel prevention and treatment interventions.

Mendelian randomization (MR) is an epidemiological approach that minimises bias affecting traditional observational epidemiology (31-33). The method uses genetic variants that are associated with the exposure of interest (in this case, anxiety) as instruments for examining the association between exposure and outcome (Figure 1). The association of the genetic variant with the outcome is analysed, under the assumption that the effect of the genetic variant is fully mediated by the exposure. This assumption is violated when horizontal pleiotropy occurs, that is, when the genetic variant is associated with other traits that also affect the outcome. Methods robust to this form of pleiotropy, and violations of other MR assumptions, have been developed. Consistency between estimates using these different methods can strengthen conclusions from MR studies (34).

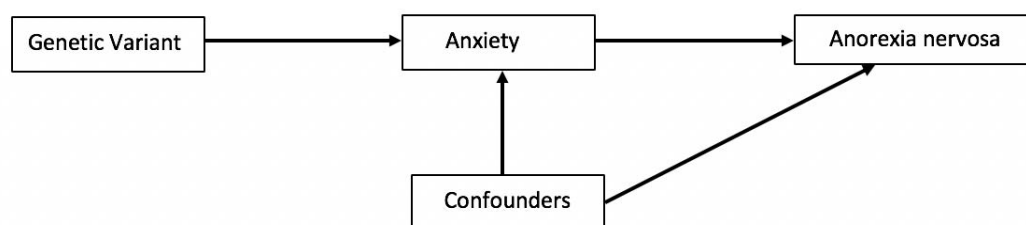

Figure 1: Diagram of a Mendelian randomization analysis

Mendel's laws of segregation and independent assortment describe the random allocation of alleles during gamete formation. An individual's genotype is the result of two such randomised transmissions: one maternal, and one paternal. The result is that genetic variants associated with the exposure of interest are generally not associated with traits that may confound the exposure-outcome association in traditional observational studies (35). Associations of a given genetic variant with the outcome of interest cannot be explained by reverse causation either, since the genotype one is born with is not altered by a disease outcome.

Where genetic variants are robustly associated with an exposure of interest, individuals with the risk increasing form of the variant will on average have greater levels of the exposure. However, groups will not differ with regard to confounding factors. MR is not concerned with making conclusions about the genetic underpinnings of an outcome, but rather with establishing an unbiased estimate of the effect of an exposure on an outcome, using genetic variants as proxy variables to achieve this (32). In a two-sample MR analysis an estimate of the association of the genetic variant with both the exposure and outcome is obtained. Gene-exposure associations are estimated in a different sample to the gene-outcome associations, meaning summary statistics from different genome-wide association studies (GWAS) may be

used to complete the analysis. This approach will yield valid estimates providing the two samples are from the same underlying population (36).

A bidirectional MR analysis of worry and AN has been completed previously (37). Worry is defined as a negatively valenced and uncontrollable thought process, intended to resolve an issue that has at least one possible negative outcome (38). Worry is conceptualised as the cognitive component of anxiety (39), correlates highly with trait anxiety (40), is present in a number of anxiety disorders and is a core symptom of Generalised Anxiety Disorder (1). The existing MR study found no evidence of a causal association between worry and AN in either direction, although the two were genetically correlated (37). The AN GWAS included a relatively small number of cases however, which will have resulted in low sensitivity to detect causal effects of worry on AN (41), and vice versa (42), in the MR analysis.

Here we used summary data from the largest GWAS of AN completed to date (43) to investigate causal effects between anxiety and AN using genetic correlation and bidirectional two sample MR approaches. We extend previous investigations by considering the association of anxiety disorder phenotypes, in addition to worry, with AN. Findings from observational studies suggest the existence of causal influences in both directions, supporting the notion of a cycle in which anxiety is relieved by dietary restriction, but then elevated beyond initial levels to prompt further starvation (9, 44). We therefore hypothesised that we would observe bidirectional effects.

# Method

## Data sources

Details of the GWAS data used in the current study are provided in Table 1. The worry phenotype was quantitative, and measured by items comprising the worry dimension of the Eysenck personality questionnaire short-form neuroticism subscale (45, 46), that was administered to participants of the UK Biobank study. Binary responses (yes/no) to the questions ‘Are you a worrier?’, ‘Do you suffer from nerves?’, ‘Would you call yourself a nervous person?’ and ‘Would you call yourself tense or highly strung’, were summed to create a total score out of four, with higher scores indicating more severe worry. Only individuals who provided valid responses to all items were included in the GWAS. The cluster of worry items are reported to display a distinct genetic signal, in comparison to other clusters of the neuroticism subscale (37).

The anxiety disorder case control phenotype reflects the presence of five core anxiety disorder pathologies (GAD, PD, social phobia, agoraphobia, specific phobia). Only individuals with threshold pathologies or no pathology were included to increase genetic signal. The quantitative anxiety disorder phenotype indicates liability for a common dimension of anxiety, and was developed from modelling covariation across the same five disorders (47). The AN phenotype was binary, and indicated lifetime AN, or eating disorder not otherwise specified AN subtype, diagnosis (43)



Table 1: GWAS Study Characteristics

| Phenotype                       | Study                   | Resource   | Sample size                  | Population | Data Source                                                                                                       |
|---------------------------------|-------------------------|------------|------------------------------|------------|-------------------------------------------------------------------------------------------------------------------|
| Worry                           | Nagel et al. 2018 (37)  | UK Biobank | 348,219                      | European   | <a href="https://ctg.cncr.nl/software/summary_statistics">https://ctg.cncr.nl/software/summary_statistics</a>     |
| Anxiety Disorder (Case Control) | Ottawa et al. 2016 (47) | ANGST      | 5712 cases<br>11598 controls | European   | <a href="https://www.med.unc.edu/pgc/results-and-downloads">https://www.med.unc.edu/pgc/results-and-downloads</a> |
| Anxiety Disorder (Quantitative) | Ottawa et al. 2016 (47) | ANGST      | 18186                        | European   | <a href="https://www.med.unc.edu/pgc/results-and-downloads">https://www.med.unc.edu/pgc/results-and-downloads</a> |
| Anorexia Nervosa                | Duncan et al. 2017 (43) | PGC        | 3495 Cases<br>10982 Controls | European   | <a href="https://www.med.unc.edu/pgc/results-and-downloads">https://www.med.unc.edu/pgc/results-and-downloads</a> |

ANGST = Anxiety NeuroGenetics Study Consortium; PGC = Psychiatric Genomics Consortium

## Genetic Instrument selection

Genetic instruments for each exposure of interest were identified from relevant GWAS statistics (Table 1). We initially used a significance threshold of  $5 \times 10^{-8}$  to select single nucleotide polymorphisms (SNPs) for use as instruments, to ensure robust associations between SNPs and each exposure (48). SNPs were clumped to ensure independence using a threshold of LD  $r^2=0.001$ , and a distance of 10000kb. Where instruments comprised a single SNP following clumping, we ran an additional sensitivity analysis using a significance threshold of  $5 \times 10^{-6}$  for instrument identification.

If palindromic SNPs were indicated for eligible instruments, proxy variants were identified with the package proxysnps (49), using an  $R^2$  threshold of  $> 0.8$ , and LD scores from the European 1000 Genomes data. Where instrumental SNPs were missing from the outcome GWAS, proxy variants were identified using the same approach, and replaced original

instruments for estimation of instrument-outcome associations where possible. Proxy variant details are provided in Table 1 of the Supplementary Material. The inclusion of proxies did not affect the independence of instrumental SNPs.

There were 60 SNPs associated with the worry exposure, 57 of which (or proxies) were available in the AN GWAS. Anxiety disorder and AN instruments included one independent SNP following clumping. When the SNP-exposure threshold was reduced, seven SNPs were associated with the anxiety disorder case control phenotype, and nine with the quantitative phenotype. The weaker AN instrument contained 16 independent SNPs; eleven were available in the worry GWAS, while eight were available in the anxiety disorder GWAS.

## **Statistical Analyses**

GWAS summary statistics were downloaded from consortium/study websites (Table 1) and converted into the format required for statistical analyses.

## **Genetic Correlation Analyses**

To estimate the genetic correlation between anxiety and AN phenotypes cross-trait linkage disequilibrium score regression (50) was implemented, using the *ldsc* command line tool (<https://github.com/bulik/ldsc>) and LD scores computed from the 1000 Genomes European data (<https://data.broadinstitute.org/alkesgroup/LDSCORE/>).

## **Mendelian Randomization Analyses**

Bidirectional MR analyses were implemented in R (51) using code available in the TwoSampleMR package of the analytical platform MR base (52), and local data.

For single SNP instruments the Wald Ratio method, or the ratio of coefficients method (53), was used to estimate the causal effect. Where multiple SNPs were identified as eligible instruments, Wald ratio estimates for the different SNPs were combined in an inverse variance weighted (IVW) analysis (54). Cochrane's Q statistic was calculated to assess the heterogeneity of estimates combined in the IVW analysis. Since the Q statistic is heavily affected by sample size,  $I^2$  and associated confidence intervals were also calculated, using formulae derived from the meta-analysis literature (55). 'Leave one out' analyses were completed when heterogeneity was detected: the IVW analysis was completed leaving out one SNP each time, and estimates plotted.

We completed three sensitivity analyses that are robust to horizontal pleiotropy, to evaluate the validity of IVW estimates. MR Egger regression (56) was used to estimate pleiotropic effects present in the IVW analysis, and provide a pleiotropy-corrected estimate of the causal effect. Rucker's Q indicates heterogeneity around the Egger estimate (57), and was deducted from Cochrane's Q; a large positive value, combined with evidence of pleiotropy, suggests the MR Egger model is a better fit to the data than the IVW model (57). Weighted median (58) and weighted mode (59) analyses, which provide consistent causal estimates when a proportion of genetic instruments are invalid, were also completed. For an overview of MR methods, see (60).

Where the MR analysis indicated a causal effect, we conducted a MR Steiger sensitivity analysis to evaluate whether the inferred direction of causal influence was correct. This estimates the variance explained in exposure and outcome for each variant, testing whether associations between genetic instruments and the exposure are stronger than corresponding associations between genetic instruments and the outcome. Where this is the case a direction

of effect from exposure to outcome is supported (61). The MR analysis was replicated using the subsample of variants that showed stronger associations with the exposure as compared to the outcome.

## **Estimate interpretation**

The causal estimate reflects the change in outcome resulting from a unit change in exposure, and estimates for binary outcomes are exponentiated to reflect the increase in odds of an outcome per unit change in exposure. When the exposure is binary, estimates denote the change in outcome, or odds of outcome, per log-odds increase in the exposure.

## **Results**

### **Genetic Correlation Analyses**

Figure 2 displays the full results of the genetic correlation analyses. We found evidence that AN was genetically correlated with the worry phenotype:  $R_g = 0.36$ ,  $SE = 0.05$ ,  $p < 0.001$ . There was no strong evidence of a genetic association between AN and either anxiety disorder exposure.

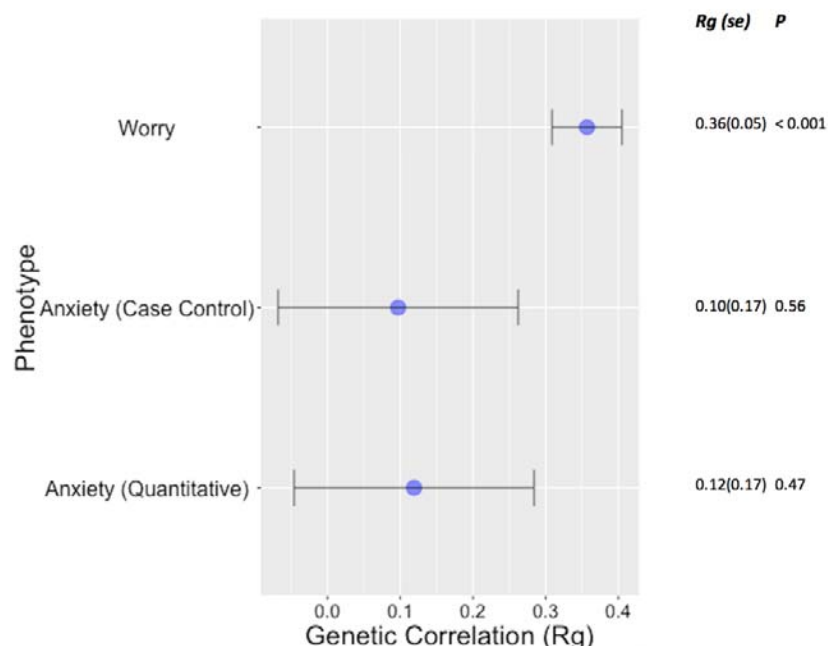

Figure 2: Genetic correlations between anxiety phenotypes and AN

## Mendelian Randomization Analyses

Bidirectional causal effects between worry/anxiety and AN phenotypes were assessed.

Findings are summarised below.

### Causal influence of worry/anxiety disorders on AN

The IVW estimate indicated that worry increased the likelihood of AN diagnosis (OR = 2.14, 95% CI: 1.18, 3.90,  $p = 0.013$ ). The weighted median estimate was consistent with this finding (OR = 2.49, 95% CI: 1.15, 5.41,  $p = 0.021$ ), and the weighted mode estimate provided weak evidence for a positive association. The MR Egger estimate was not consistent with IVW, weighted median and weighted mode estimates, and confidence intervals around the estimate were very wide (Figure 3). Wald ratio estimates for each SNP are available in Figure 1 of Supplementary Material.

Outcomes of the MR Steiger investigation indicated that 37 of 57 variants showed stronger associations with the exposure as compared to the outcome (Supplementary Material, Table

2). Point estimates of the MR analysis using only these variants were consistent with those of the analysis including all 57 genetic instruments (i.e. supported worry increasing risk for AN), however the former were relatively imprecise (Supplementary Material, Figure 2).

There was no evidence for a causal influence of anxiety disorder pathology on AN in the single SNP analyses (Figure 3). Findings from sensitivity analyses that used multiple independent SNPs (less strongly associated with the anxiety disorder exposure) were consistent with those of single SNP analyses (Supplementary Material, Figures 3 and 4).

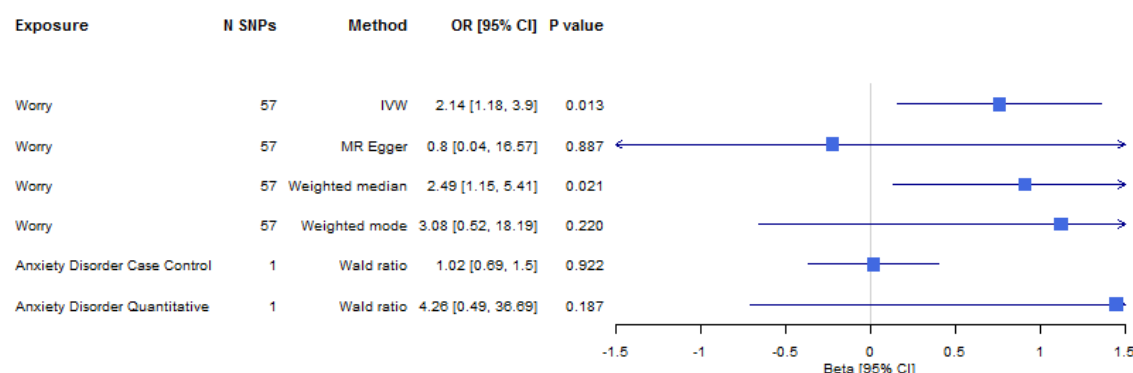

Figure 3: Mendelian randomization analysis to estimate causal influence of anxiety phenotypes on AN

### Causal influence of AN on worry/anxiety disorders

There was no strong evidence for a causal influence of AN on the worry phenotype, or either anxiety disorder phenotype, using the single SNP instrument (rs4622308) that was significant at the genome-wide level (Figure 4). Inferences from analyses using multiple SNP instruments did not qualitatively differ (Supplementary Material, Figures 5 - 7), with effect estimates remaining close to the null.

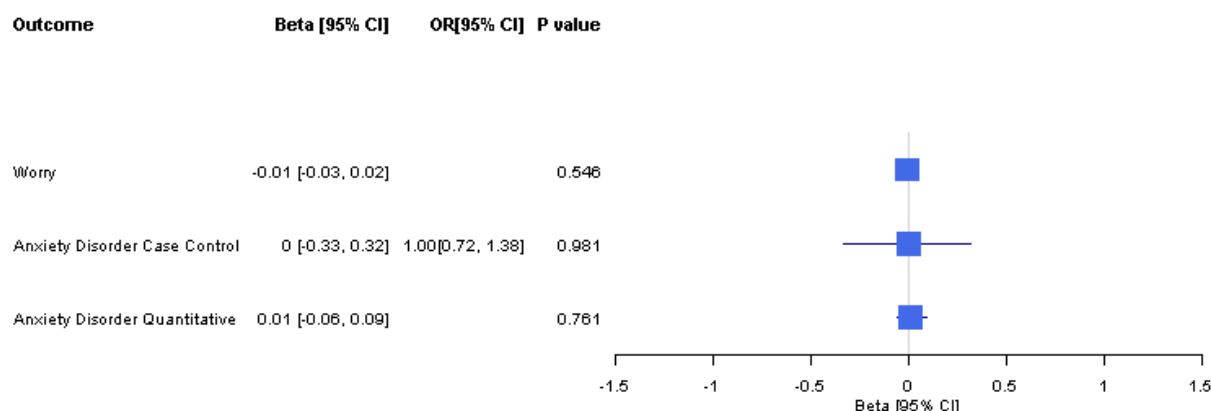

Figure 4: Mendelian randomization analysis to estimate causal influence of AN on anxiety phenotypes

## Pleiotropy and Heterogeneity

The MR Egger intercept did not provide evidence for horizontal pleiotropy in analyses including multiple SNPs. Cochrane's Q statistic did indicate heterogeneity in the analysis of the causal effect of worry on AN. However, the  $I^2$  statistic (and associated confidence intervals) did not. In the multiple SNP analysis of the causal effect of AN on the quantitative anxiety disorder phenotype, heterogeneity was indicated by Cochrane's Q and  $I^2$ . A leave one out sensitivity analysis did not suggest an overriding influence of any individual SNP, and in all multiple SNP analyses the confidence intervals of each SNP estimate overlapped. There was no marked improvement in heterogeneity with MR Egger estimates, relative to IVW estimates, in any of the multiple SNP analyses. Collectively there is no evidence to support bias caused by horizontal pleiotropy in IVW estimates of the study (for more detail see Supplementary Material, Tables 3 - 5 and Figures 8 and 9).

## Discussion

This study introduced MR to the study of AN, to investigate bidirectional effects of anxiety phenotypes and AN. The results of our MR analyses suggest that the genetic correlation identified between worry and AN is at least partly driven by worry exerting a causal

influence on AN. In contrast there was no evidence to support a causal effect of AN on worry. There was also no evidence for causal effects between anxiety disorder pathology and AN, or of a genetic correlation between these phenotypes.

The finding that non-specific worry (i.e. worry that is not particularly directed towards eating and weight-gain) exerts a causal effect on AN risk is consistent with findings from previous cross-sectional (62-64) and longitudinal (65) observational studies. It has been suggested that worry inhibits emotional processing, and hinders problem solving (62), leading to a dependence on less adaptive coping mechanisms. Alternatively the focus on eating and weight (44), and even the neurobiological effects of dietary restriction (10, 66), may serve to alleviate worry in individuals who develop AN. Another possibility is that the process of worrying may put individuals at risk for a range of psychopathologies, with the content of worry determining the specific disorder that develops. Individuals with AN have elevated worry generally, but concern is particularly heightened in relation to eating, weight and shape (67, 68). Such may result when individuals prone to worrying direct their attention towards eating and weight, to drive the severe dietary restriction that is characteristic of AN.

While the precise mechanisms by which worry exerts its causal effects on AN require further investigation, our findings highlight the potential utility of addressing worry in eating disorder prevention. Existing interventions largely do not target non-specific forms of worry, and instead address disordered eating/weight-associated cognition. Two recent reviews highlight the efficacy of a number of existing interventions (particularly dissonance-based, cognitive-behavioural based, healthy weight programmes, media literacy programmes), in reducing disordered eating behaviour, and eating disorder symptoms, in individuals identified as at risk of eating disorders (69, 70). Future trials might explore whether the addition of



components that reduce worry enhance the beneficial outcomes of these existing interventions. Worry may be targeted by a variety of adjunctive therapies (71). Mindfulness modules may be particularly useful additions to existing interventions given mindfulness practice discourages automatic and habitual patterns of thinking, including worry (71), and is reported to reduce body dissatisfaction (72). The benefits of reducing worry are likely to extend beyond eating disorder prevention, given the relevance of worry to both anxiety and depression (71).

Worry being a shared feature of both AN and anxiety disorders could explain the absence of causal association between AN and anxiety disorders observed in this study. Both anxiety and AN phenotypes may be underpinned by the common process of worry, with the presence of one signalling heightened risk for the other. Confounding of the anxiety disorder – AN association by a common factor would explain why the MR finding does not converge with previous observational studies (21, 30, 73). The latter report associations between anxiety disorders and AN but are subject to confounding, which is minimised in MR.

## **Strengths and Limitations**

A strength of the study is the use of MR, an approach that minimises risks of confounding and reverse causality, to robustly address questions of aetiology using secondary data. Sources of bias in MR are different from those affecting traditional observational epidemiology. The result of this is that where inferences from MR studies and those using other methods are consistent, as is the case for effects of worry on AN risk, we may be more confident that inferences are valid (74). This is particularly so when bias operates in different directions across studies, which might be expected here given bias in two-sample MR is typically towards the null (36).

A limitation of the MR approach is that it makes a number of assumptions that cannot be fully tested. The risk of confounding is reduced as compared to within studies of traditional epidemiological design, however it remains possible. We could not verify whether the genetic instruments were associated with plausible confounders of the exposure-outcome association in our sample, given the use of summary data (36). It is also impossible to determine whether instruments are associated with outcomes through pathways other than via the exposure of interest (75). To reduce the risk of incorrect inferences we completed a number of sensitivity analyses when multiple genetic instruments were available, with each sensitivity analysis robust to different MR assumptions. The causal effect of worry on AN was supported by all but the MR Egger estimate, which was very imprecise. Furthermore, the absence of evidence for pleiotropy, and the lack of improvement in heterogeneity in the MR Egger versus IVW model, suggests the IVW model provided a better fit to the data (57). Using estimates of  $R^2$  we confirmed that the majority of variants supported a direction of effect from worry to AN. Furthermore, MR estimates (IVW and sensitivity analyses) completed with this majority subsample of variants were consistent with the inference that worry increases risk of AN. We reduced the threshold for the strength of association between genetic variant and exposure to complete multiple-variant analyses of causal effects of anxiety disorders and AN, and subsequent sensitivity analyses. Findings of these analyses were consistent with those of the single-variant analyses. There was little evidence for heterogeneity across SNP estimates in all multiple-variant analyses, further supporting the absence of bias due to horizontal pleiotropy (76).

We used the largest GWAS for each phenotype of interest to date to maximise power (77), which could explain the discrepancy with a prior MR analysis that did not observe a causal

effect of worry on AN (37). The anxiety disorder and AN GWAS sample sizes remained relatively small however, limiting power to detect a genetic correlation (50), as well as causal effects (77), between the two. This situation is likely to have been exacerbated by the anxiety disorder GWAS identifying variants associated with five anxiety disorders, introducing noise into the genetic signal (47). The primary determinant of power in a MR analysis is instrument strength, or variance in the exposure explained by the genetic instruments (41). Instrument strength in respect of the anxiety disorder and AN exposures is low, given few SNPs were robustly associated with these exposures, even when the threshold for association was reduced. This is likely to result from low statistical power of the GWASs, due to their sample size (78). Reducing the threshold for instrument identification further would have improved power (41). However the use of additional instruments increases the potential for pleiotropy (31), particularly when these instruments are weak. The use of weak instruments also introduces bias into the MR estimate due to confounding factors explaining greater variation in exposure and outcome compared to the instruments (42). In the case of two-sample MR this bias is in the direction of the null (77). Given the limitations surrounding power it is possible meaningful genetic associations between, and causal effects of, anxiety disorders and AN went undetected. Future studies should explore such further, using larger GWASs (with greater power to detect meaningful associations between instrumental SNPs and exposures) as these become available.

## **Conclusion**

The current study provides evidence for a causal influence of worry on AN. This finding is consistent with outcomes of previous observational studies, and may inform directions for future AN research and intervention. The low genetic signal in anxiety disorder and AN GWASs means we were not able to adequately assess the causal influence of these

phenotypes. GWAS sample sizes are constantly growing, hopefully allowing for identification of increasingly robust genetic instruments for anxiety disorders and AN. This in turn will minimise bias and improve power, for rigorous assessment of causality that (with appropriate triangulation) can improve understanding and outcomes of AN.

## **Acknowledgements**

We are grateful to the participants who contributed to each of the GWASs considered in our study, and the research staff who collected and made available the data we used. The views expressed in this article are those of the authors and do not reflect official positions of our institutions or funders.

## **Contributors**

ECL and MRM conceived the study. ECL conducted the analysis and drafted the initial manuscript. HS guided all stages of the analysis. All authors assisted with interpretation of study outcomes, refining of manuscript drafts, and approved the final manuscript. ECL is the guarantor and attests that all listed authors meet authorship criteria and that no others meeting the criteria have been omitted.

## **Funding**

ECL is supported by an Economic and Social Research Council (ESRC) Studentship award (ES/J50015X/1). HS and MRM are members of the MRC Integrative Epidemiology Unit at the University of Bristol funded by the Medical Research Council (<https://mrc.ukri.org/>; MC\_UU\_00011/7). MRM is a member of the NIHR Biomedical Research Centre at the University Hospitals Bristol NHS Foundation Trust and the University of Bristol. The views expressed in this publication are those of the authors and not necessarily those of the UK National Health Service, National Institute for Health Research, or Department of Health and Social Care. The funding bodies had no role in the design and conduct of the study; the collection, management, analysis, or interpretation of data; or the preparation, review, or approval of the manuscript.

## **Competing Interests**

All authors have completed the ICMJE uniform disclosure form at [http://www.icmje.org/coi\\_disclosure.pdf](http://www.icmje.org/coi_disclosure.pdf) and declare: no support from any organisation for the submitted work; no financial relationships with any organisations that might have an interest in the submitted work in the previous three years; and no other relationships or activities that could appear to have influenced the submitted work.

## **Ethics Approval**

Participants gave informed consent for study participation and data sharing, as described in articles detailing original GWASs for each phenotype. Additional ethics approval was not required for this study.

## **Data Sharing**

All summary data used in the current study are publicly available. The AN and Anxiety Disorder GWAS summary statistics are available from the Psychiatric Genomics Consortium: <https://www.med.unc.edu/pgc/results-and-downloads>. Summary statistics in respect of the worry GWAS have been made available for download by the Complex Trait Genetics group, at the Center for Neurogenomics and Cognitive Research: [https://ctg.cncr.nl/software/summary\\_statistics](https://ctg.cncr.nl/software/summary_statistics).

## **Patient and public involvement**

The current research used secondary data and was therefore not informed by patient and public involvement. We encourage future research directed by findings of the current study to seek patient and public guidance.

## **Transparency**

The lead author affirms that this manuscript is an honest, accurate, and transparent account of the study being reported; that no important aspects of the study have been omitted; and that any discrepancies from the study as planned have been explained.

## References

1. American Psychiatric Association. Diagnostic and statistical manual of mental disorders (DSM-5®): American Psychiatric Pub; 2013.
2. Smink FR, van Hoeken D, Hoek HW. Epidemiology of eating disorders: incidence, prevalence and mortality rates. *Curr Psychiatry Rep.* 2012;14(4):406-14.
3. Micali N, Martini MG, Thomas JJ, Eddy KT, Kothari R, Russell E, et al. Lifetime and 12-month prevalence of eating disorders amongst women in mid-life: a population-based study of diagnoses and risk factors. *BMC Med.* 2017;15(1):12.
4. Mehler PS, Brown C. Anorexia nervosa - medical complications. *J Eat Disord.* 2015;3:11.
5. Arcelus J, Mitchell AJ, Wales J, Nielsen S. Mortality rates in patients with anorexia nervosa and other eating disorders. A meta-analysis of 36 studies. *Arch Gen Psychiatry.* 2011;68(7):724-31.
6. Brockmeyer T, Friederich HC, Schmidt U. Advances in the treatment of anorexia nervosa: a review of established and emerging interventions. *Psychol Med.* 2018;48(8):1228-56.
7. Zipfel S, Giel KE, Bulik CM, Hay P, Schmidt U. Anorexia nervosa: aetiology, assessment, and treatment. *The Lancet Psychiatry.* 2015;2(12):1099-111.
8. Kaye WH, Barbarich NC, Putnam K, Gendall KA, Fernstrom J, Fernstrom M, et al. Anxiolytic effects of acute tryptophan depletion in anorexia nervosa. *International Journal of Eating Disorders.* 2003;33(3):257-67.
9. Kaye W. Neurobiology of anorexia and bulimia nervosa. *Physiol Behav.* 2008;94(1):121-35.
10. Nunn K, Frampton I, Lask B. Anorexia nervosa--a noradrenergic dysregulation hypothesis. *Med Hypotheses.* 2012;78(5):580-4.
11. Lloyd EC, Frampton I, Verplanken B, Haase AM. How extreme dieting becomes compulsive: A novel hypothesis for the role of anxiety in the development and maintenance of anorexia nervosa. *Medical Hypotheses.* 2017;108(Supplement C):144-50.
12. Schulze UME, Calame S, Keller F, Mehler-Wex C. Trait anxiety in children and adolescents with anorexia nervosa. *Eating and Weight Disorders-Studies on Anorexia Bulimia and Obesity.* 2009;14(2-3):E163-E8.
13. Lule D, Schulze UME, Bauer K, Scholl F, Muller S, Fladung AK, Uttner I. Anorexia nervosa and its relation to depression, anxiety, alexithymia and emotional processing deficits. *Eating and Weight Disorders-Studies on Anorexia Bulimia and Obesity.* 2014;19(2):209-16.
14. Marzola E, Fassino S, Amianto F, Abbate-Daga G. Affective temperaments in anorexia nervosa: The relevance of depressive and anxious traits. *Journal of Affective Disorders.* 2017;218:23-9.
15. Kaye WH, Bulik CM, Thornton L, Barbarich N, Masters K. Comorbidity of anxiety disorders with anorexia and bulimia nervosa. *Am J Psychiatry.* 2004;161(12):2215-21.
16. Dellava JE, Kendler KS, Neale MC. GENERALIZED ANXIETY DISORDER AND ANOREXIA NERVOSA: EVIDENCE OF SHARED GENETIC VARIATION. *Depression and Anxiety.* 2011;28(8):728-33.
17. Taborrelli E, Krug I, Karwautz A, Wagner G, Haidvogel M, Fernandez-Aranda F, et al. Maternal anxiety, overprotection and anxious personality as risk factors for eating disorder: A sister pair study. *Cognitive Therapy and Research.* 2013;37(4):820-8.
18. Kim YR, Heo SY, Kang H, Song KJ, Treasure J. Childhood risk factors in Korean women with anorexia nervosa: Two sets of case-control studies with retrospective comparisons. *International Journal of Eating Disorders.* 2010;43(7):589-95.

19. Kaye WH, Bulik CM, Thornton L, Barbarich N, Masters K, Price Fdn Collaborative G. Comorbidity of anxiety disorders with anorexia and bulimia nervosa. *American Journal of Psychiatry*. 2004;161(12):2215-21.
20. Raney TJ, Thornton LM, Berrettini W, Brandt H, Crawford S, Fichter MM, et al. Influence of overanxious disorder of childhood on the expression of anorexia nervosa. *Int J Eat Disord*. 2008;41(4):326-32.
21. Meier SM, Bulik CM, Thornton LM, Mattheisen M, Mortensen PB, Petersen L. Diagnosed Anxiety Disorders and the Risk of Subsequent Anorexia Nervosa: A Danish Population Register Study. *European Eating Disorders Review*. 2015;23(6):524-30.
22. Buckner JD, Silgado J, Lewinsohn PM. Delineation of differential temporal relations between specific eating and anxiety disorders. *Journal of Psychiatric Research*. 2010;44(12):781-7.
23. Kezelman S, Touyz S, Hunt C, Rhodes P. Does anxiety improve during weight restoration in anorexia nervosa? A systematic review. *J Eat Disord*. 2015;3:7.
24. Herpertz-Dahlmann B, Seitz J, Baines J. Food matters: how the microbiome and gut-brain interaction might impact the development and course of anorexia nervosa. *European Child & Adolescent Psychiatry*. 2017;26(9):1031-41.
25. Douyon L, Schteingart DE. Effect of obesity and starvation on thyroid hormone, growth hormone, and cortisol secretion. *Endocrinol Metab Clin North Am*. 2002;31(1):173-89.
26. Hebebrand J, Exner C, Hebebrand K, Holtkamp C, Casper RC, Remschmidt H, et al. Hyperactivity in patients with anorexia nervosa and in semistarved rats: evidence for a pivotal role of hypoleptinemia. *Physiol Behav*. 2003;79(1):25-37.
27. Bourre J-M. Effects of nutrients (in food) on the structure and function of the nervous system: update on dietary requirements for brain. Part 2: macronutrients. *The journal of nutrition, health & aging*. 2006;10(5):386.
28. Keys A. *The Biology of human starvation* / by Ancel Keys...[et al.] ; with forewords by J.C. Drummond...[et al.]. Minneapolis: Minneapolis : University of Minnesota Press; 1950.
29. Watkins E, Serpell L. The Psychological Effects of Short-Term Fasting in Healthy Women. *Front Nutr*. 2016;3:27.
30. Micali N, Solmi F, Horton NJ, Crosby RD, Eddy KT, Calzo JP, et al. Adolescent eating disorders predict psychiatric, highrisk behaviors and weight outcomes in young adulthood. *European Child and Adolescent Psychiatry*. 2015;1):S70.
31. Davey Smith G, Ebrahim S. 'Mendelian randomization': can genetic epidemiology contribute to understanding environmental determinants of disease?\*. *International Journal of Epidemiology*. 2003;32(1):1-22.
32. Ebrahim S, Davey Smith G. Mendelian randomization: can genetic epidemiology help redress the failures of observational epidemiology? *Human Genetics*. 2008;123(1):15-33.
33. Davey Smith G, Hemani G. Mendelian randomization: genetic anchors for causal inference in epidemiological studies. *Human Molecular Genetics*. 2014;23(R1):R89-R98.
34. Hemani G, Bowden J, Davey Smith G. Evaluating the potential role of pleiotropy in Mendelian randomization studies. *Hum Mol Genet*. 2018.
35. Bochud M, Rousson V. Usefulness of Mendelian Randomization in Observational Epidemiology. *International Journal of Environmental Research and Public Health*. 2010;7(3):711-28.
36. Lawlor DA. Commentary: Two-sample Mendelian randomization: opportunities and challenges. *International Journal of Epidemiology*. 2016;45(3):908-15.



37. Nagel M, Jansen PR, Stringer S, Watanabe K, de Leeuw CA, Bryois J, et al. Meta-analysis of genome-wide association studies for neuroticism in 449,484 individuals identifies novel genetic loci and pathways. *Nat Genet.* 2018;50(7):920-7.
38. Borkovec TD, Robinson E, Pruzinsky T, DePree JA. Preliminary exploration of worry: some characteristics and processes. *Behav Res Ther.* 1983;21(1):9-16.
39. Eysenck MW. *Anxiety: The cognitive perspective*; Psychology Press; 2013.
40. Eysenck MW, Van Berkum J. Trait anxiety, defensiveness, and the structure of worry. *Personality and Individual Differences.* 1992;13(12):1285-90.
41. Burgess S. Sample size and power calculations in Mendelian randomization with a single instrumental variable and a binary outcome. *International Journal of Epidemiology.* 2014;43(3):922-9.
42. Burgess S, Thompson SG, Collaboration CCG. Avoiding bias from weak instruments in Mendelian randomization studies. *Int J Epidemiol.* 2011;40(3):755-64.
43. Duncan L, Yilmaz Z, Gaspar H, Walters R, Goldstein J, Anttila V, et al. Significant Locus and Metabolic Genetic Correlations Revealed in Genome-Wide Association Study of Anorexia Nervosa. *American Journal of Psychiatry.* 2017;174(9):850-8.
44. Pallister E, Waller G. Anxiety in the eating disorders: understanding the overlap. *Clin Psychol Rev.* 2008;28(3):366-86.
45. Mor N, Zinbarg RE, Craske MG, Mineka S, Uliaszek A, Rose R, et al. Evaluating the invariance of the factor structure of the EPQ-R-N among adolescents. *J Pers Assess.* 2008;90(1):66-75.
46. Eysenck SBG, Eysenck HJ, Barrett P. A revised version of the psychoticism scale. *Personality and Individual Differences.* 1985;6(1):21-9.
47. Otowa T, Hek K, Lee M, Byrne EM, Mirza SS, Nivard MG, et al. Meta-analysis of genome-wide association studies of anxiety disorders. *Molecular psychiatry.* 2016;21(10):1391-9.
48. Swerdlow DI, Kuchenbaecker KB, Shah S, Sofat R, Holmes MV, White J, et al. Selecting instruments for Mendelian randomization in the wake of genome-wide association studies. *Int J Epidemiol.* 2016;45(5):1600-16.
49. Slowikowski K. proxysnps: Get proxy SNPs for a SNP in the 1000 Genomes Project. (0.0.1 ed).
50. Bulik-Sullivan B, Finucane HK, Anttila V, Gusev A, Day FR, Loh P-R, et al. An Atlas of Genetic Correlations across Human Diseases and Traits. *Nature genetics.* 2015;47(11):1236-41.
51. Team RC. *R: A Language and Environment for Statistical Computing*. R Foundation for Statistical Computing; 2017.
52. Hemani G, Zheng J, Elsworth B, Wade KH, Haberland V, Baird D, et al. The MR-Base platform supports systematic causal inference across the human phenome. *eLife.* 2018;7:e34408.
53. Wald A. The Fitting of Straight Lines if Both Variables are Subject to Error. *Ann Math Statist.* 1940;11(3):284-300.
54. Burgess S, Butterworth A, Thompson SG. Mendelian Randomization Analysis With Multiple Genetic Variants Using Summarized Data. *Genetic Epidemiology.* 2013;37(7):658-65.
55. Higgins J, Thompson SG. Quantifying heterogeneity in a meta-analysis. *Statistics in medicine.* 2002;21(11):1539-58.
56. Bowden J, Davey Smith G, Burgess S. Mendelian randomization with invalid instruments: effect estimation and bias detection through Egger regression. *International Journal of Epidemiology.* 2015;44(2):512-25.

57. Bowden J, Del Greco M F, Minelli C, Davey Smith G, Sheehan N, Thompson J. A framework for the investigation of pleiotropy in two-sample summary data Mendelian randomization. *Stat Med*. 2017;36(11):1783-802.
58. Bowden J, Davey Smith G, Haycock PC, Burgess S. Consistent Estimation in Mendelian Randomization with Some Invalid Instruments Using a Weighted Median Estimator. *Genet Epidemiol*. 2016;40(4):304-14.
59. Hartwig FP, Davey Smith G, Bowden J. Robust inference in summary data Mendelian randomization via the zero modal pleiotropy assumption. *Int J Epidemiol*. 2017;46(6):1985-98.
60. Davies NM, Holmes MV, Davey Smith G. Reading Mendelian randomisation studies: a guide, glossary, and checklist for clinicians. *BMJ*. 2018;362:k601.
61. Hemani G, Tilling K, Davey Smith G. Correction: Orienting the causal relationship between imprecisely measured traits using GWAS summary data. *PLoS Genet*. 2017;13(12):e1007149.
62. Startup H, Lavender A, Oldershaw A, Stott R, Tchanturia K, Treasure J, Schmidt U. Worry and rumination in anorexia nervosa. *Behav Cogn Psychother*. 2013;41(3):301-16.
63. Sternheim L, Startup H, Schmidt U. Anxiety-related processes in anorexia nervosa and their relation to eating disorder pathology, depression and anxiety. *Advances in Eating Disorders*. 2015;3(1):13-9.
64. Oldershaw A, Lavender T, Sallis H, Stahl D, Schmidt U. Emotion generation and regulation in anorexia nervosa: a systematic review and meta-analysis of self-report data. *Clin Psychol Rev*. 2015;39:83-95.
65. Sala M, Levinson CA. The longitudinal relationship between worry and disordered eating: Is worry a precursor or consequence of disordered eating? *Eat Behav*. 2016;23:28-32.
66. Kaye WH, Wierenga CE, Bailer UF, Simmons AN, Bischoff-Grethe A. Nothing tastes as good as skinny feels: the neurobiology of anorexia nervosa. *Trends Neurosci*. 2013;36(2):110-20.
67. Sternheim L, Startup H, Saeidi S, Morgan J, Hugo P, Russell A, Schmidt U. Understanding catastrophic worry in eating disorders: process and content characteristics. *J Behav Ther Exp Psychiatry*. 2012;43(4):1095-103.
68. Cooper Z, Cooper PJ, Fairburn CG. The validity of the eating disorder examination and its subscales. *Br J Psychiatry*. 1989;154:807-12.
69. Le LK-D, Barendregt JJ, Hay P, Mihalopoulos C. Prevention of eating disorders: A systematic review and meta-analysis. *Clinical Psychology Review*. 2017;53:46-58.
70. Watson HJ, Joyce T, French E, Willan V, Kane RT, Tanner-Smith EE, et al. Prevention of eating disorders: A systematic review of randomized, controlled trials. *Int J Eat Disord*. 2016;49(9):833-62.
71. Topper M, Emmelkamp PM, Ehring TJAaPP. Improving prevention of depression and anxiety disorders: Repetitive negative thinking as a promising target. 2010;14(1-4):57-71.
72. Beccia AL, Dunlap C, Hanes DA, Courneene BJ, Zwickey HL. Mindfulness-based eating disorder prevention programs: A systematic review and meta-analysis. *Mental Health & Prevention*. 2018;9:1-12.
73. Swinbourne JM, Touyz SW. The co-morbidity of eating disorders and anxiety disorders: a review. *Eur Eat Disord Rev*. 2007;15(4):253-74.
74. Lawlor DA, Tilling K, Davey Smith G. Triangulation in aetiological epidemiology. *Int J Epidemiol*. 2016;45(6):1866-86.
75. Greenland S. An introduction To instrumental variables for epidemiologists. *Int J Epidemiol*. 2000;29(6):1102.

76. Burgess S, Bowden J, Fall T, Ingelsson E, Thompson SG. Sensitivity Analyses for Robust Causal Inference from Mendelian Randomization Analyses with Multiple Genetic Variants. *Epidemiology*. 2017;28(1):30-42.
77. Pierce BL, Burgess S. Efficient Design for Mendelian Randomization Studies: Subsample and 2-Sample Instrumental Variable Estimators. *American Journal of Epidemiology*. 2013;178(7):1177-84.
78. Klein RJ. Power analysis for genome-wide association studies. *BMC Genet*. 2007;8:58.
